# Supplementary material
Source: HighWire-hosted journal article supplement (https://bmjophth.bmj.com/content/5/1/e000354)
Supplement: inline-supplementary-material-2 [file inline-supplementary-material-2.pdf]

**Supplemental Figure 2**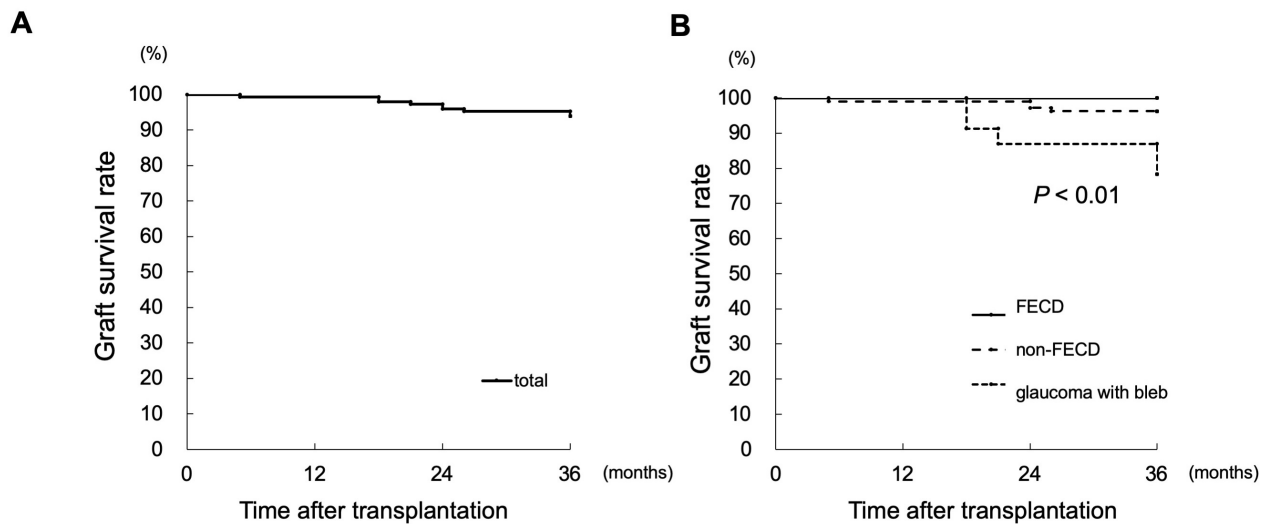

**Supplemental Figure 2.** Graphs showing a cumulative Kaplan-Meier graft survival curve post Descemet stripping endothelial keratoplasty (DSAEK) in patients who were followed for 3-years postoperative. The graft survival rate in total eyes (A) and in three different subgroups, including Fuchs endothelial corneal dystrophy (FECD), non-FECD bullous keratopathy (BK) (i.e., non-FECD), and BK patients with a previous history of trabeculectomy or tube shunt surgery (glaucoma with bleb) (B). Statistical analysis was performed with log-rank test.
